# Supplementary material for: Semantic segmentation to identify bladder layers from H&E Images
Source: Diagn Pathol. 2020 Jul 16;15:87. doi: 10.1186/s13000-020-01002-1 (PMC7364471; doi:10.1186/s13000-020-01002-1)
Supplement: Supplementary file 1 — Additional file 1. [file 13000_2020_1002_MOESM1_ESM.xlsx]

## Sheet: Sheet1
	Validation Accuracies					Test Accuracies					Validation Accuracies					Test Accuracies					Validation Accuracies					Test Accuracies
	8 He Normal	Acc	TP	FN		8 He Normal	Acc	TP	FN		10 He Normal	Acc	TP	FN		10 He Normal	Acc	TP	FN		12 He Normal	Acc	TP	FN		12 He Normal	Acc	TP	FN
	Background	0.999426	94424339	54224		Background	0.99959	119213206	48864		Background	0.999992	94477763	800		Background	0.999992	119261140	930		Background	0.992708	91488149	672063		Background	0.999618	119216562	45508
	Lamina Propria	0.99389	28939686	177916		Lamina Propria	0.968825	52727211	1696663		Lamina Propria	0.0810295	2359385	26758217		Lamina Propria	0.0385362	2097288	52326586		Lamina Propria	0.990109	27861365	278336		Lamina Propria	0.97908	53285338	1138536
	Muscularis Propria	0.885491	110788573	14326899		Muscularis Propria	0.895826	22782045	2649277		Muscularis Propria	0.43581	54526540	70588932		Muscularis Propria	0.237088	6029463	19401859		Muscularis Propria	0.873524	105691097	15302863		Muscularis Propria	0.879347	22362961	3068361
	Mucosa	0.867236	11433732	1750370		Mucosa	0.90186	37076397	4034633		Mucosa	0.0198875	262199	12921903		Mucosa	4.7919e-06	197	41110833		Mucosa	0.89832	11391120	1289356		Mucosa	0.968854	39830580	1280450
	RBC	0.921781	9996911	848300		RBC	0.927719	1884697	146841		RBC	0.0241782	262218	10582993		RBC	2.95343e-06	6	2031532		RBC	0.986792	10701972	143239		RBC	0.933435	1896309	135229
	Cautery	0.620605	6424900	3927745		Cautery	0.284715	6701447	16835934		Cautery	0.329185	3407937	6944708		Cautery	0.0891069	2097344	21440037		Cautery	0.638734	6612587	3740058		Cautery	0.408292	9610122	13927259
	Inflammation	0.93889	41268732	2686066		Inflammation	0.524464	9082821	8235484		Inflammation	0.417482	18350337	25604461		Inflammation	0.0605555	1048719	16269586		Inflammation	0.967592	41619905	1393986		Inflammation	0.40898	7082849	10235456
	Muscularis Mucosa	0.89933	1511039	169144		Muscularis Mucosa	N/A	N/A	N/A		Muscularis Mucosa	2.38069e-06	4	1680179		Muscularis Mucosa	N/A	N/A	N/A		Muscularis Mucosa	0.841377	1371094	258490		Muscularis Mucosa	N/A	N/A	N/A
	8 He Uniform	Acc	TP	FN		8 He Uniform	Acc	TP	FN		10 He Uniform	Acc	TP	FN		10 He Uniform	Acc	TP	FN		12 He Uniform	Acc	TP	FN		12 He Uniform	Acc	TP	FN
	Background	0.996023	94102823	375740		Background	0.99934	119183303	78767		Background	0.999249	94407619	70944		Background	0.999185	119164876	97194		Background	0.999994	94478021	542		Background	0.999992	119261132	938
	Lamina Propria	0.995957	28999873	117729		Lamina Propria	0.980496	53362413	1061461		Lamina Propria	0.997576	29047032	70570		Lamina Propria	0.970147	52799133	1624741		Lamina Propria	0.0817276	2379712	26737890		Lamina Propria	0.0392235	2134694	52289180
	Muscularis Propria	0.882506	110415113	14700359		Muscularis Propria	0.79013	20094052	5337270		Muscularis Propria	0.892018	111605227	13510245		Muscularis Propria	0.955393	24296916	1134406		Muscularis Propria	0.436418	54602691	70512781		Muscularis Propria	0.237885	6049721	19381601
	Mucosa	0.845087	11141710	2042392		Mucosa	0.788148	32401589	8709441		Mucosa	0.893739	11783151	1400951		Mucosa	0.909265	37380827	3730203		Mucosa	0.0210061	276947	12907155		Mucosa	0.00144431	59377	41051653
	RBC	0.967566	10493462	351749		RBC	0.5461	1109423	922115		RBC	0.998571	10829711	15500		RBC	0.907174	1842959	188579		RBC	0.0250855	272058	10573153		RBC	0	0	2031538
	Cautery	0.710306	7353542	2999103		Cautery	0.228543	5379300	18158081		Cautery	0.808928	8374544	1978101		Cautery	0.677591	15948715	7588666		Cautery	0.329181	3407889	6944756		Cautery	0.0891008	2097199	21440182
	Inflammation	0.9644	42390008	1564790		Inflammation	0.414007	7169891	10148414		Inflammation	0.975591	42881902	1072896		Inflammation	0.693115	12003580	5314725		Inflammation	0.418073	18376313	25578485		Inflammation	0.0612507	1060759	16257546
	Muscularis Mucosa	0.893279	1500873	179310		Muscularis Mucosa	N/A	N/A	N/A		Muscularis Mucosa	0.847878	1424591	255592		Muscularis Mucosa	N/A	N/A	N/A		Muscularis Mucosa	0.00129748	2180	1678003		Muscularis Mucosa
	8 Glorot Uniform	Acc	TP	FN		8 Glorot Uniform	Acc	TP	FN		10 Glorot Uniform	Acc	TP	FN		10 Glorot Uniform	Acc	TP	FN		12 Glorot Uniform	Acc	TP	FN		12 Glorot Uniform	Acc	TP	FN
	Background	0.993491	93863612	614951		Background	0.994202	118570612	691458		Background	0.995526	94055874	422689		Background	0.996464	118840356	421714		Background	0.998189	94307500	171063		Background	0.999713	119227796	34274
	Lamina Propria	0.983163	28627351	490251		Lamina Propria	0.962525	52384353	2039521		Lamina Propria	0.990499	28840946	276656		Lamina Propria	0.987774	53758468	665406		Lamina Propria	0.990044	28827715	289887		Lamina Propria	0.98165	53425198	998676
	Muscularis Propria	0.929509	116295992	8819480		Muscularis Propria	0.800733	20363710	5067612		Muscularis Propria	0.905086	113240254	11875218		Muscularis Propria	0.695611	17690302	7741020		Muscularis Propria	0.891631	111556771	13558701		Muscularis Propria	0.724611	18427805	7003517
	Mucosa	0.810441	10684940	2499162		Mucosa	0.718056	29520020	11591010		Mucosa	0.695741	9172722	4011380		Mucosa	0.875075	35975241	5135789		Mucosa	0.752789	9924850	3259252		Mucosa	0.901432	37058790	4052240
	RBC	0.629422	6826217	4018994		RBC	0.54238	1101865	929673		RBC	0.657717	7133078	3712133		RBC	0.788501	1601869	429669		RBC	0.959284	10403635	441576		RBC	0.660923	1342690	688848
	Cautery	0.730452	7562115	2790530		Cautery	0.340473	8013832	15523549		Cautery	0.601753	6229733	4122912		Cautery	0.163563	3849847	19687534		Cautery	0.786324	8140531	2212114		Cautery	0.184883	4351654	19185727
	Inflammation	0.763986	33580840	10373958		Inflammation	0.385828	6681895	10636410		Inflammation	0.725746	31900035	12054763		Inflammation	0.337865	5851244	11467061		Inflammation	0.83112	36531730	7423068		Inflammation	0.391062	6772535	10545770
	Muscularis Mucosa	0.907264	1524369	155814		Muscularis Mucosa	N/A	N/A	N/A		Muscularis Mucosa	0.904519	1519758	160425		Muscularis Mucosa	N/A	N/A	N/A		Muscularis Mucosa	0.901782	1515158	165025		Muscularis Mucosa	N/A	N/A	N/A
	8 Glorot Normal	Acc	TP	FN		8 Glorot Normal	Acc	TP	FN		10 Glorot Normal	Acc	TP	FN		10 Glorot Normal	Acc	TP	FN		12 Glorot Normal	Acc	TP	FN		12 Glorot Normal	Acc	TP	FN
	Background	0.999244	94407145	71418		Background	0.994805	118642510	619560		Background	0.994808	93988041	490522		Background	0.993641	118503687	758383		Background	0.96554	91222849	3255714		Background	0.964107	114981387	4280683
	Lamina Propria	0.987392	28750484	367118		Lamina Propria	0.954043	51922737	2501137		Lamina Propria	0.951245	27697974	1419628		Lamina Propria	0.917528	49935422	4488452		Lamina Propria	0.994236	28949765	167837		Lamina Propria	0.983474	53524486	899388
	Muscularis Propria	0.906968	113475747	11639725		Muscularis Propria	0.917343	23329250	2102072		Muscularis Propria	0.967854	121093471	4022001		Muscularis Propria	0.939787	23900030	1531292		Muscularis Propria	0.910697	113942236	11173236		Muscularis Propria	0.867791	22069063	3362259
	Mucosa	0.79923	10537136	2646966		Mucosa	0.884622	36367709	4743321		Mucosa	0.86	11338322	1845780		Mucosa	0.840255	34543747	6567283		Mucosa	0.8297	10938843	2245259		Mucosa	0.713498	29332621	11778409
	RBC	0.827412	8973453	1871758		RBC	0.550928	1119232	912306		RBC	0.252364	2736946	8108265		RBC	7.92503e-05	161	2031377		RBC	0.993493	10774639	70572		RBC	0.962953	1956275	75263
	Cautery	0.611707	6332789	4019856		Cautery	0.465584	10958620	12578761		Cautery	0.671162	6948300	3404345		Cautery	0.261574	6156769	17380612		Cautery	0.731602	7574017	2778628		Cautery	0.735112	17302600	6234781
	Inflammation	0.965603	42442864	1511934		Inflammation	0.719524	12460944	4857361		Inflammation	0.76113	33455303	10499495		Inflammation	0.399231	6914006	10404299		Inflammation	0.974198	42820690	1134108		Inflammation	0.403457	6987186	10331119
	Muscularis Mucosa	0.898926	1510360	169823		Muscularis Mucosa	N/A	N/A	N/A		Muscularis Mucosa	0.905134	1520790	159393		Muscularis Mucosa	N/A	N/A	N/A		Muscularis Mucosa	0.904335	1519448	160735		Muscularis Mucosa	N/A	N/A	N/A
